# Supplementary material for: Exciplex polymer with strong AIE for constructing fully-solution-processed organic light-emitting diodes with 100-fold efficiency improvement compared to physically blended exciplex
Source: Royal Society of Chemistry journal article supplement (doi:10.1039/d2py01306a), 2022-01-01
Supplement: d2py01306a1.pdf [file d2py01306a1.pdf]

## Supporting Information

### **Exciplex polymer with strong AIE property for constructing fully-solution-processed organic light-emitting diodes with 100-folds efficiency improvement comparing to physical blend exciplex**

Xinxin Ban,<sup>\*#a,b</sup> Suyu Qiu,<sup>#a</sup> Qingpeng Cao,<sup>a</sup> Kaizhi Zhang,<sup>a</sup> Tao Zhou,<sup>a</sup> Hui Xu,<sup>a</sup> Ming Pei,<sup>a</sup> Fengjie Ge,<sup>a</sup> Zhiwei, Tong,<sup>\*a</sup> Wei Jiang<sup>\*b</sup>

<sup>a</sup> School of Environmental and Chemical Engineering, Jiangsu Key Laboratory of Function Control Technology for Advanced Materials, Jiangsu Ocean University, Lianyungang, Jiangsu, 222005, China

<sup>b</sup> School of Chemistry and Chemical Engineering, Southeast University, Nanjing, Jiangsu, 211189, China

\*Corresponding Authors Email: [banxx@jou.edu.cn](mailto:banxx@jou.edu.cn); [zhiweitong575@hotmail.com](mailto:zhiweitong575@hotmail.com); [jiangw@seu.edu.cn](mailto:jiangw@seu.edu.cn);

#Xinxin Ban and Suyu Qiu contributed equally to this work.

#### **General information**

The UV-Vis absorption spectra of the compounds were measured by SHIMADZU UV-2450. The photoluminescence emission spectra were recorded on HORIBA FLUOROMAX-4. Differential scanning calorimetry (DSC) curves were recorded with a Netzsch simultaneous thermal analyzer (STA) system (STA 409PC) and DSC 2910 modulated calorimeter under a dry nitrogen gas flow at a heating rate of 10 °C min<sup>-1</sup>. All chemicals and reagents were used as received from commercial sources without further purification. Solvents for chemical synthesis were purified according to the standard procedures. The manipulations involving air-sensitive reagents were performed under a dry nitrogen atmosphere. <sup>1</sup>H and <sup>13</sup>C NMR spectra were recorded on a BRUKER AMX instrument. Elemental analysis was determined by an Elementar Vario EL CHN elemental analyzer. Molecular masses were measured by a BRUKER DALTONICS Matrix-assisted laser desorption-ionization time-of-flight mass spectrometry (MALDI-TOF-MS). As for the investigation of oxygen quenching effect, the integrating sphere was purged with flowing nitrogen during the whole measuring process. Cyclic voltammetry (CV) was performed on a CHI750C voltammetric analyzer in a typical three-electrode cell with a platinum plate working electrode, a platinum wire counter electrode and a silver wire reference electrode. The optimized structure was calculated by Gaussian 09 at the B3LYP functional with 6-31G basis sets.

**Device Fabrication and Measurements.** Indium tin oxide (ITO)-coated glass substrates were precleaned carefully using deionized water and ultrasonicated sequentially in ethanol and acetone successively. After cleaned in a UV-ozone oven for 20 min, the PEDOT:PSS aqueous solution was spin-coated onto the ITO substrate with 3000 rpm for 60 s to get a 30 nm hole transporting layer. The substrates were then dried at 200 °C for 10 min and taken into a nitrogen glove box, where the concentration of 10 mg/mL P-TRZ-TPA were spin-coated onto PEDOT:PSS layer with 2000 rpm for 30 s and annealed at 100 °C for 30 min. As for in-situ polymerization, V-TPA:V-TRZ needs another thermal annealing at 200 °C for 20 min. After cooling, a 50 nm PhPO as the electron transporting layer was spin-coated onto emission layer with 2000 rpm for 30 s from isopropanol and annealed at 100 °C for 30 min. the substrate was transfer to High Vacuum Turbo Evaporator with the pressure of below  $5 \times 10^{-4}$ , where 1 nm  $\text{Cs}_2\text{CO}_3$  and 100 nm Al was deposited as the cathode. The combination of an Ocean Optics spectrograph, a Konica Minolta LS-110 luminance meter and a Keithley 2400 Source meter were used to get the EL spectra, device luminance, and current density-voltage characteristics. All the device was tested in the condition of the atmosphere with no protective encapsulation.

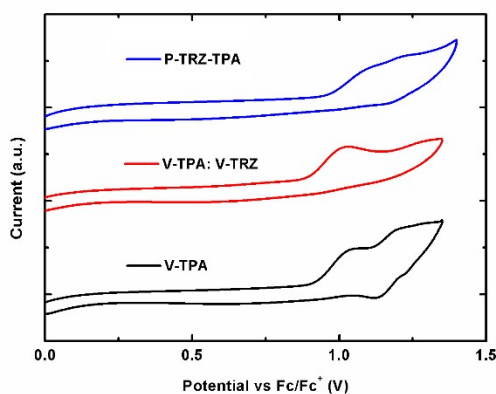

**Figure S1.** Cyclic voltammograms of P-TRZ-TPA, V-TPA:V-TRZ and V-TPA at the first scan circle.

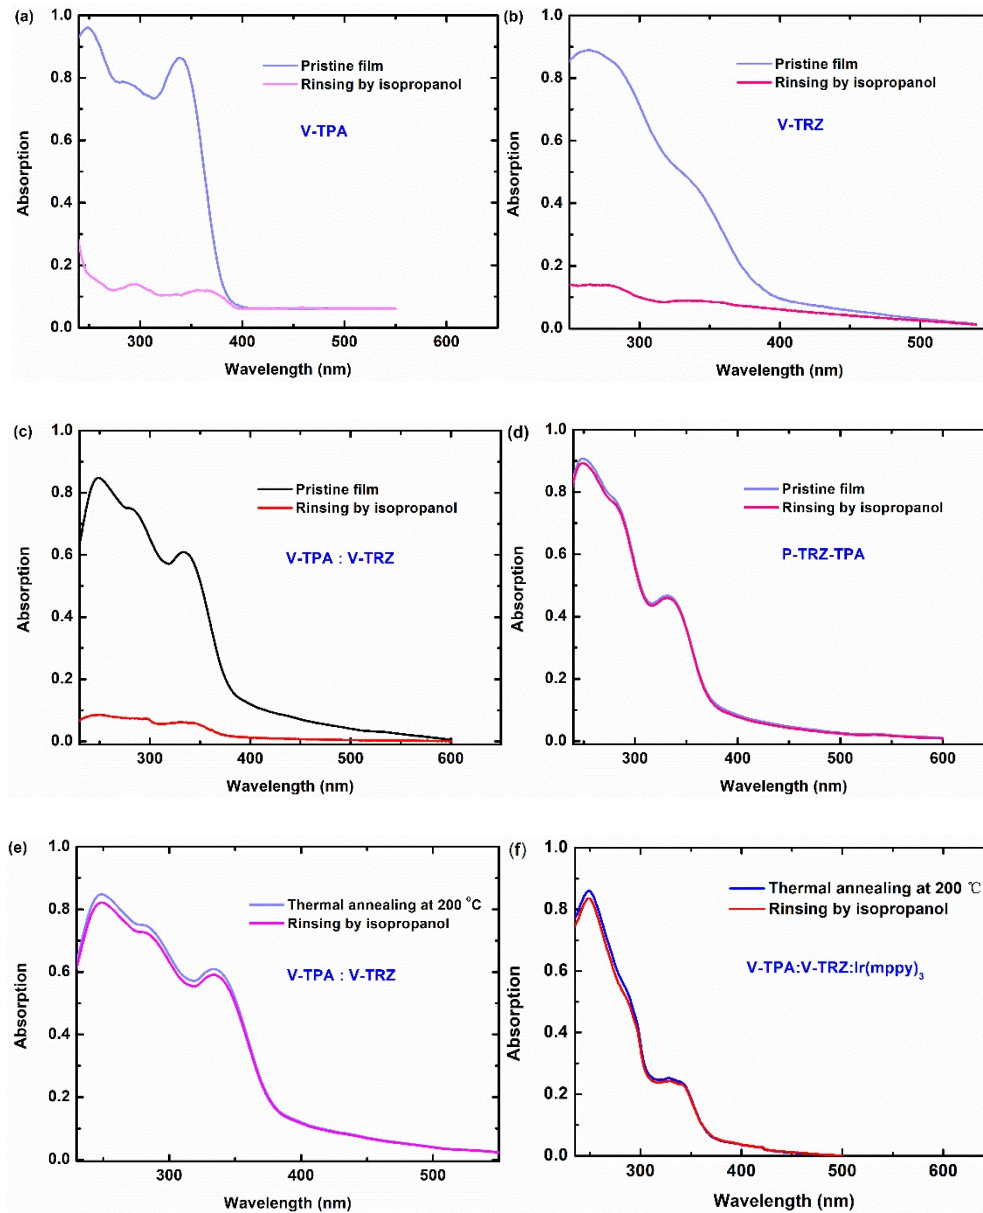

**Figure S2.** UV absorption spectra of (a) V-TPA, (b) V-TRZ, (c) V-TPA:V-TRZ (d) P-TRZ-TPA (e) V-TPA:V-TRZ thermal annealing, (f) V-TPA:V-TRZ:Ir(mppy)<sub>3</sub> thermal annealing films before and after rinsing with isopropanol on quartz.

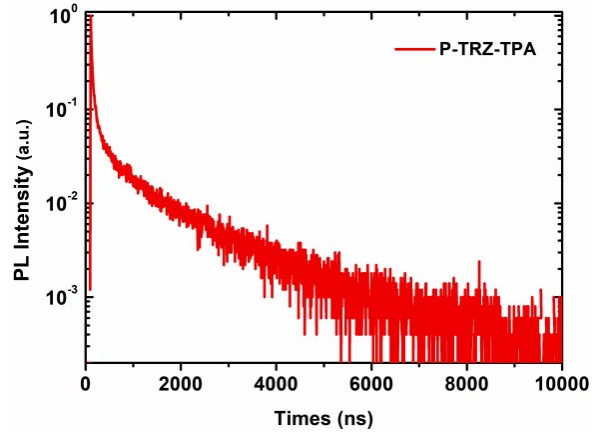

**Figure S3.** Transient photoluminescence decay curves of P-TRZ-TPA.

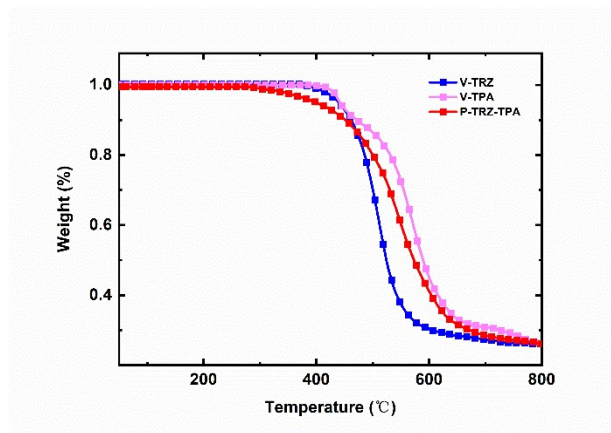

**Figure S4.** TGA curves of V-TRZ, V-TPA and P-TRZ-TPA recorded at a heating rate of  $10\text{ }^{\circ}\text{C min}^{-1}$ .

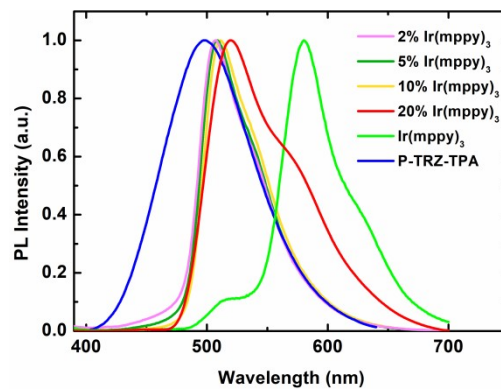

**Figure S5.** The PL spectra of P-TRZ-TPA: Ir(mppy)<sub>3</sub> doped films with various doping.

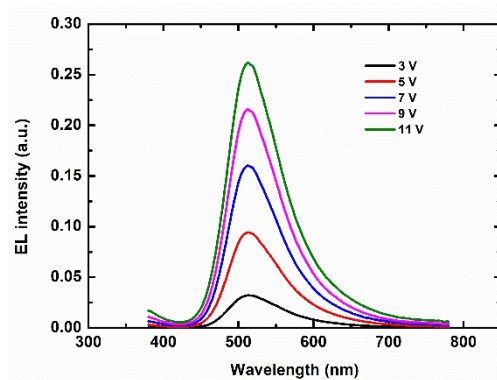

**Figure S6.** EL spectra of P-TRZ-TPA as luminescent layer

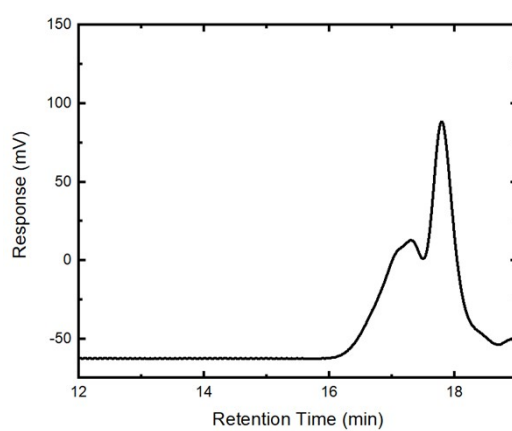

**Figure S7.** GPC curve of P-TRZ-TPA

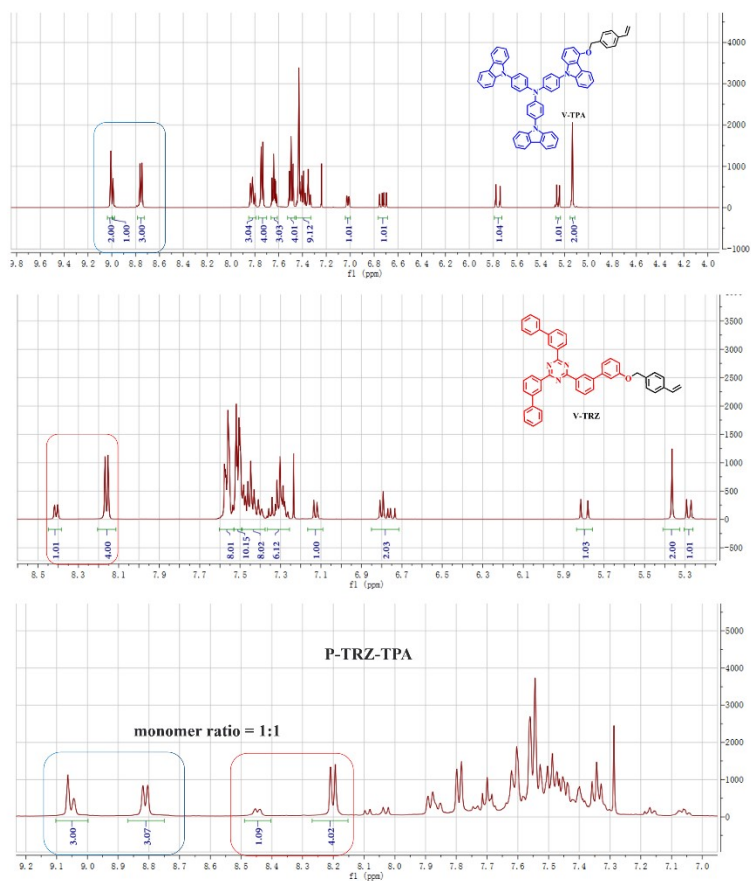

**Figure S8.**  $^1\text{H NMR}$  spectrum of V-TPA, V-TRZ and P-TRZ-TPA.

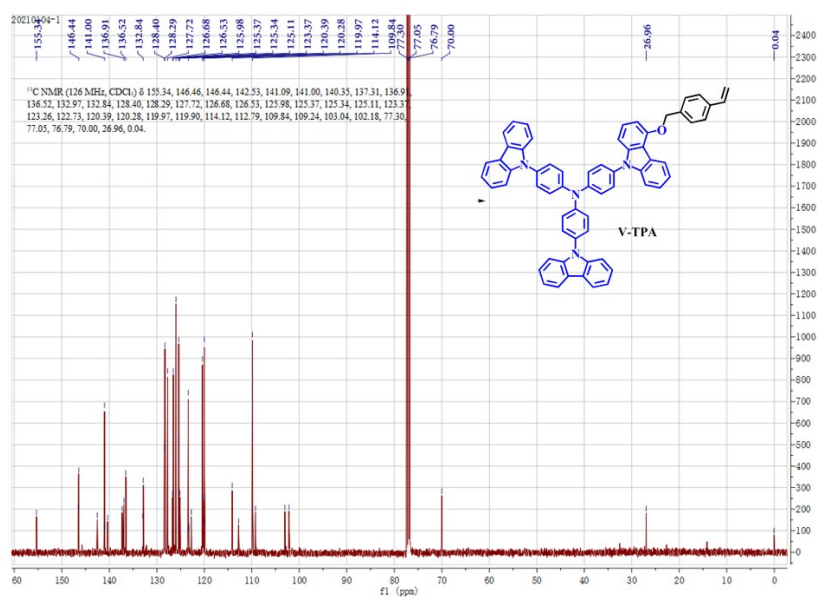

**Figure S9.**  $^{13}\text{C NMR}$  spectrum of V-TPA.

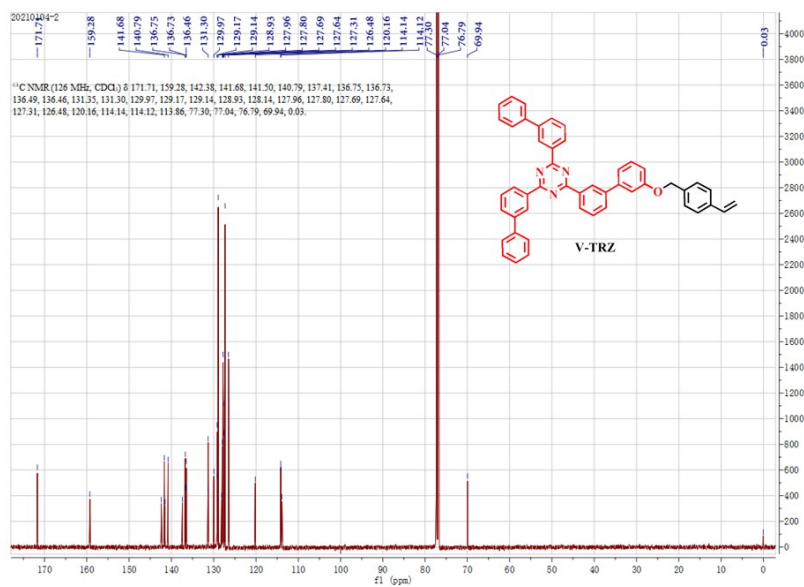

**Figure S10.** <sup>13</sup>C NMR spectrum of V-TRZ.
